# Supplementary material
Source: PubMed Central journal article supplement (PMC6025894)
Supplement: NIHMS975420-supplement-supplement_1.pdf [file NIHMS975420-supplement-supplement_1.pdf]

Supplemental Figure 1: Study sample selection.

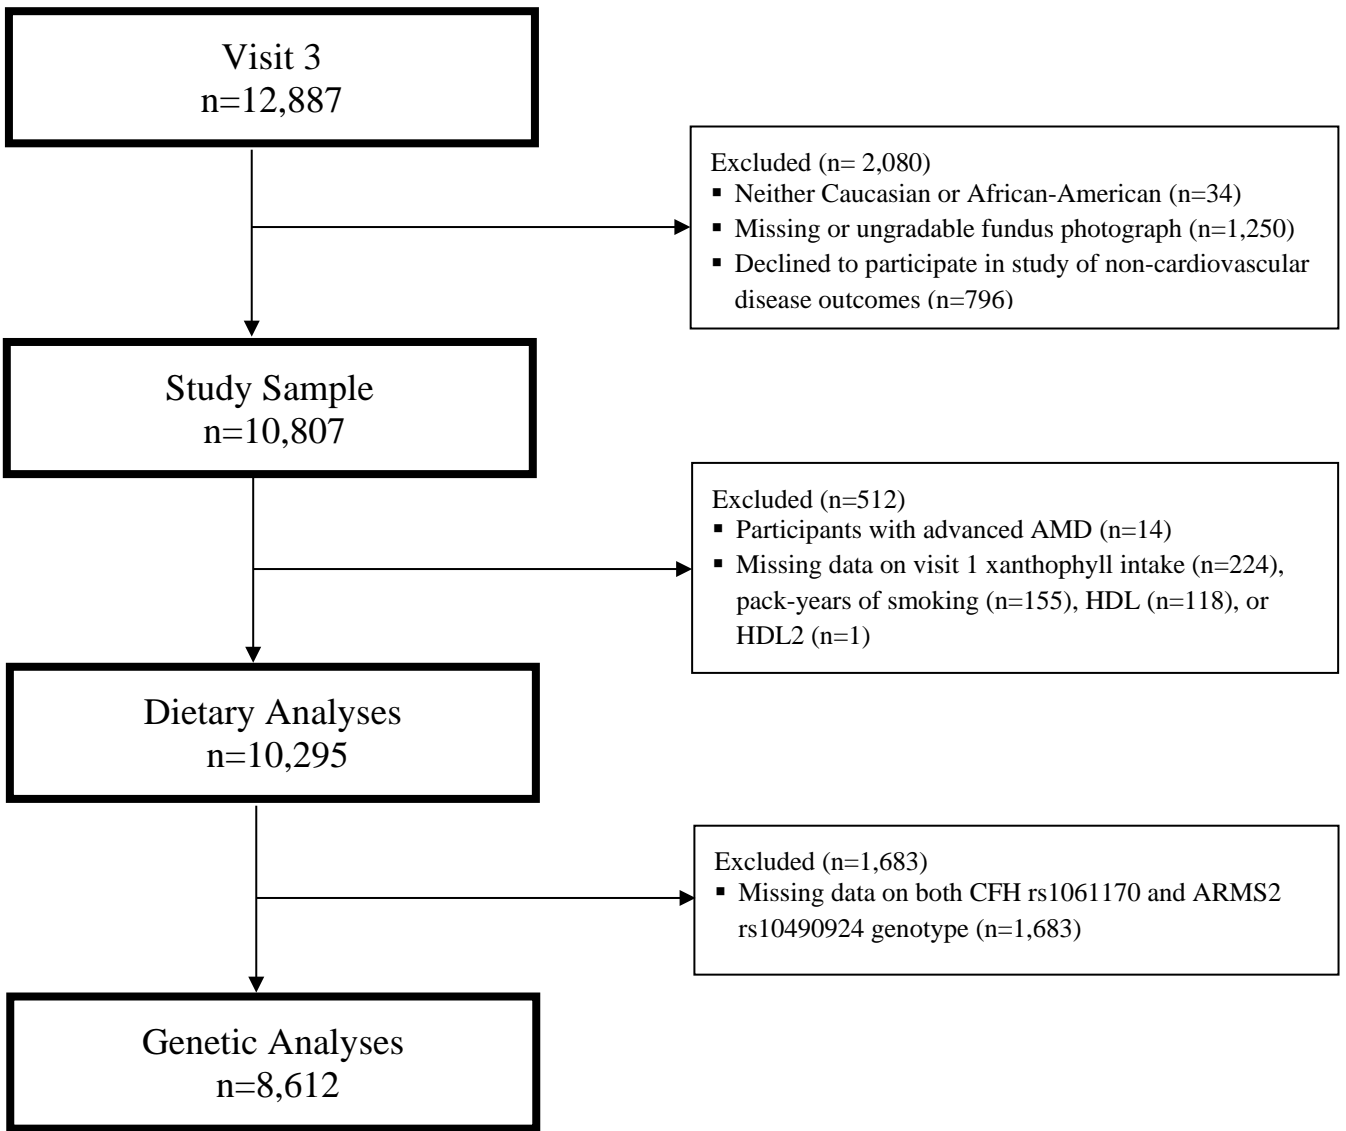

Supplemental Table 1: Participant characteristics by prevalent early AMD status (n=10,295).\*

|                                                               | <i>Total</i><br><i>n (%)<sup>†</sup></i> | <i>No</i><br><i>n (%)</i> | <i>Yes</i><br><i>n (%)</i> | <i>p-value</i> |
|---------------------------------------------------------------|------------------------------------------|---------------------------|----------------------------|----------------|
| <b>DEMOGRAPHICS</b>                                           |                                          |                           |                            |                |
| <b>Age (mean±SEM)</b>                                         | 53.9±0.1                                 | 53.7±0.1                  | 56.0 ±0.2                  | <0.001         |
| <b>Sex</b>                                                    |                                          |                           |                            | 0.027          |
| Men                                                           | 4,662 (45)                               | 4,395 (45)                | 267 (50)                   |                |
| Women                                                         | 5,633 (55)                               | 5,365 (55)                | 268 (50)                   |                |
| <b>Race</b>                                                   |                                          |                           |                            | 0.008          |
| African-American                                              | 2,038 (20)                               | 1,956 (20)                | 82 (15)                    |                |
| Caucasian                                                     | 8,257 (80)                               | 7,804 (80)                | 453 (85)                   |                |
| <b>Education</b>                                              |                                          |                           |                            | 0.095          |
| Missing Data (n)                                              | 10                                       | 10                        | 0                          |                |
| Basic (<11 years)                                             | 1,972 (19)                               | 1,853 (19)                | 119 (22)                   |                |
| Intermediate (12-16 years)                                    | 4,368 (43)                               | 4,138 (42)                | 230 (43)                   |                |
| Advanced (17-21 years)                                        | 3,945 (38)                               | 3,759 (39)                | 186 (35)                   |                |
| <b>Household Income, Adjusted for Family Size<sup>†</sup></b> |                                          |                           |                            | 0.02           |
| Missing Data (n)                                              | 337                                      | 318                       | 19                         |                |
| Tertile 1 (≤\$17,350)                                         | 3,453 (35)                               | 3,266 (35)                | 187 (36)                   |                |
| Tertile 2 (>\$17,350-\$31,249)                                | 3,322 (33)                               | 3,130 (33)                | 192 (37)                   |                |
| Tertile 3 (≥\$31,250)                                         | 3,183 (32)                               | 3,046 (32)                | 137 (27)                   |                |
| <b>Health Insurance</b>                                       |                                          |                           |                            | 0.44           |
| Missing Data (n)                                              | 11                                       | 11                        | 0                          |                |
| No                                                            | 758 (7)                                  | 714 (7)                   | 44 (8)                     |                |
| Yes                                                           | 9,526 (93)                               | 9,035 (93)                | 491 (92)                   |                |
| <b>ARIC Field Center</b>                                      |                                          |                           |                            | 0.005          |
| Forsyth County, NC                                            | 2787 (27)                                | 2,622 (27)                | 165 (31)                   |                |
| Jackson, MS                                                   | 1759 (17)                                | 1,690 (17)                | 69 (13)                    |                |
| Minneapolis, MN                                               | 3000 (29)                                | 2,860 (29)                | 140 (26)                   |                |
| Washington County, MD                                         | 2749 (27)                                | 2,588 (27)                | 161 (30)                   |                |
| <b>HEALTH BEHAVIORS</b>                                       |                                          |                           |                            |                |
| <b>Cigarette Smoking Status</b>                               |                                          |                           |                            | 0.26           |
| Never                                                         | 4,534 (44)                               | 4,312 (44)                | 222 (42)                   |                |
| Former                                                        | 3,419 (33)                               | 3,224 (33)                | 195 (36)                   |                |
| Current                                                       | 2,342 (23)                               | 2,224 (23)                | 118 (22)                   |                |
| <b>Pack-years (mean±SEM)</b>                                  | 14.9±0.2                                 | 14.8±0.2                  | 18.0±0.9                   | <0.001         |

|                                                                                                    | <i>Total</i><br><i>n (%)</i> <sup>†</sup> | <i>No</i><br><i>n (%)</i> | <i>Yes</i><br><i>n (%)</i> | <i>p-value</i> |
|----------------------------------------------------------------------------------------------------|-------------------------------------------|---------------------------|----------------------------|----------------|
| <b>Ethanol Intake (mean±SEM)</b>                                                                   | 43.2±0.9                                  | 43.0±1.0                  | 46.0±4.1                   | 0.47           |
| Missing Data (n)                                                                                   | 36                                        | 31                        | 5                          |                |
| <b>PHYSICAL EXAMINATION, PAST MEDICAL HISTORY, AND ANTHROPOMETRICS</b>                             |                                           |                           |                            |                |
| <b>Hypertension (≥140/90 mmHg or use of antihypertensive medications)</b>                          |                                           |                           |                            | 0.017          |
| Missing Data (n)                                                                                   | 41                                        | 35                        | 6                          |                |
| No                                                                                                 | 7,050 (69)                                | 6,711 (69)                | 339 (64)                   |                |
| Yes                                                                                                | 3,204 (31)                                | 3,014 (31)                | 190 (36)                   |                |
| <b>BMI Category</b>                                                                                |                                           |                           |                            | 0.50           |
| Missing Data (n)                                                                                   | 6                                         | 6                         | 0                          |                |
| Not Overweight or Obese <25                                                                        | 3,463 (34)                                | 3,295 (34)                | 168 (31)                   |                |
| Overweight (≥25 and <30)                                                                           | 4,147 (40)                                | 3,927 (40)                | 220 (41)                   |                |
| Obese (≥30)                                                                                        | 2,679 (26)                                | 2,532 (26)                | 147 (28)                   |                |
| <b>Prevalent Diabetes (fasting glucose ≥126; random glucose ≥200; use of diabetes medications)</b> |                                           |                           |                            |                |
| Missing Data (n)                                                                                   | 18                                        | 18                        | 0                          | 0.78           |
| No                                                                                                 | 9,294 (90)                                | 8,812 (90)                | 482 (90)                   |                |
| Yes                                                                                                | 983 (10)                                  | 930 (10)                  | 53 (10)                    |                |
| <b>Prevalent Congestive Heart Failure</b>                                                          |                                           |                           |                            | 0.29           |
| Missing Data (n)                                                                                   | 177                                       | 169                       | 8                          |                |
| No                                                                                                 | 9,708 (96)                                | 9,207 (96)                | 501 (95)                   |                |
| Yes                                                                                                | 410 (4)                                   | 384 (4)                   | 26 (5)                     |                |
| <b>Prevalent Myocardial Infarction</b>                                                             |                                           |                           |                            | 0.78           |
| Missing Data (n)                                                                                   | 132                                       | 127                       | 5                          |                |
| No                                                                                                 | 9,815 (97)                                | 9,302 (97)                | 513 (97)                   |                |
| Yes                                                                                                | 348 (3)                                   | 331 (3)                   | 17 (3)                     |                |
| <b>Prevalent Stroke</b>                                                                            |                                           |                           |                            | 0.92           |
| Missing Data (n)                                                                                   | 23                                        | 22                        | 1                          |                |
| No                                                                                                 | 10,152 (99)                               | 9,624 (99)                | 528 (99)                   |                |
| Yes                                                                                                | 120 (1)                                   | 114 (1)                   | 6 (1)                      |                |
| <b>LIPID METABOLISM</b>                                                                            |                                           |                           |                            |                |
| <b>HDL (mean±SEM, mmol/L)</b>                                                                      | 1.34±0.004                                | 1.34±0.004                | 1.31±0.02                  | 0.14           |
| <b>HDL Category, Median Split (mmol/L)</b>                                                         |                                           |                           |                            | 0.67           |
| Low (<1.27 mmol/L)                                                                                 | 5,122 (50)                                | 4,851 (50)                | 271 (51)                   |                |
| High (≥1.27 mmol/L)                                                                                | 5,173 (50)                                | 4,909 (50)                | 264 (49)                   |                |
| <b>HDL2 (mean±SEM, mmol/L)</b>                                                                     | 0.37±0.002                                | 0.37±0.002                | 0.35±0.01                  | 0.15           |
| <b>HDL2 Category, Median Split (mmol/L)</b>                                                        |                                           |                           |                            | 0.06           |

|                                                          | <i>Total</i><br><i>n (%)<sup>†</sup></i> | <i>No</i><br><i>n (%)</i> | <i>Yes</i><br><i>n (%)</i> | <i>p-value</i> |
|----------------------------------------------------------|------------------------------------------|---------------------------|----------------------------|----------------|
| Low (<0.33 mmol/L)                                       | 5,039 (49)                               | 4,756 (49)                | 283 (53)                   |                |
| High (≥0.33 mmol/L)                                      | 5,256 (51)                               | 5,004 (51)                | 252 (47)                   |                |
| <b>HDL3 (mean±SEM, mmol/L)</b>                           | 0.97±0.003                               | 0.97±0.003                | 0.95±0.01                  | 0.28           |
| <b>HDL3 Category, Median Split (mmol/L)</b>              |                                          |                           |                            | 0.25           |
| Low (<0.95 mmol/L)                                       | 5,198 (50)                               | 4,915 (50)                | 283 (53)                   |                |
| High (≥0.95 mmol/L)                                      | 5,097 (50)                               | 4,845 (50)                | 252 (47)                   |                |
| <b>Apolipoprotein A1 (mean±SEM, μmol/L)</b>              | 47.3±0.1                                 | 47.4±0.1                  | 46.6±0.5                   | 0.11           |
| <b>Apolipoprotein A1 Category, Median Split (μmol/L)</b> |                                          |                           |                            | 0.26           |
| Low (<46.26 μmol/L)                                      | 5,103 (50)                               | 4,825 (49)                | 278 (52)                   |                |
| High (≥46.26 μmol/L)                                     | 5,192 (50)                               | 4,935 (51)                | 257 (48)                   |                |
| <b>Apolipoprotein B (mean±SEM, μmol/L)</b>               | 1.69±0.01                                | 1.69±0.01                 | 1.72±0.02                  | 0.24           |
| Missing Data (n)                                         | 2                                        | 1                         | 1                          |                |
| <b>Apolipoprotein B Category, Median Split (μmol/L)</b>  |                                          |                           |                            | 0.26           |
| Missing Data (n)                                         | 2                                        | 1                         | 1                          |                |
| Low (<1.62 μmol/L)                                       | 5,121 (50)                               | 4,868 (50)                | 253 (47)                   |                |
| High (≥1.62 μmol/L)                                      | 5,172 (50)                               | 4,891 (50)                | 281 (53)                   |                |
| <b>LDL (mean±SEM, mmol/L)</b>                            | 3.55±0.01                                | 3.55±0.01                 | 3.59±0.04                  | 0.33           |
| Missing Data (n)                                         | 144                                      | 136                       | 8                          |                |
| <b>LDL Category, Median Split (mmol/L)</b>               |                                          |                           |                            | 0.036          |
| Missing Data (n)                                         | 144                                      | 136                       | 8                          |                |
| Low (<3.49 mmol/L)                                       | 5,074 (50)                               | 4,834 (50)                | 240 (46)                   |                |
| High (≥3.49 mmol/L)                                      | 5,077 (50)                               | 4,790 (50)                | 287 (54)                   |                |
| <b>Triglycerides (mean±SEM, mmol/L)</b>                  | 1.48±0.01                                | 1.48±0.01                 | 1.49±0.04                  | 0.78           |
| <b>Triglycerides Category, Median Split (mmol/L)</b>     |                                          |                           |                            | 0.60           |
| Low (<1.24 mmol/L)                                       | 5,117 (50)                               | 4,857 (50)                | 260 (49)                   |                |
| High (≥1.24 mmol/L)                                      | 5,178 (50)                               | 4,903 (50)                | 275 (51)                   |                |
| <b>NUTRITIONAL AND DIETARY FACTORS</b>                   |                                          |                           |                            |                |
| <b>Daily caloric intake (kcal)</b>                       | 1631±6                                   | 1631±6                    | 1630±26                    | 0.97           |
| <b>Daily carbohydrate intake (%kcal)</b>                 | 48.7±0.1                                 | 48.7±0.1                  | 48.5±0.4                   | 0.52           |
| <b>Daily protein intake (%kcal)</b>                      | 17.9±0.04                                | 17.9±0.04                 | 18.0±0.2                   | 0.75           |
| <b>Daily total fat intake (%kcal)</b>                    | 33.0±0.1                                 | 33.0±0.1                  | 33.0±0.3                   | 0.85           |
| <b>Daily monounsaturated fat intake (%kcal)</b>          | 12.65±0.03                               | 12.65±0.03                | 12.69±0.13                 | 0.76           |
| <b>Daily polyunsaturated fat intake (%kcal)</b>          | 5.05±0.01                                | 5.06±0.01                 | 4.98±0.06                  | 0.25           |
| <b>Daily omega-3 fatty acid intake (% kcal)</b>          | 0.14±0.001                               | 0.14±0.001                | 0.14±0.006                 | 0.80           |
| <b>Daily zinc intake (mg/1000 kcal)</b>                  | 6.81±0.02                                | 6.80±0.02                 | 6.87±0.08                  | 0.42           |

|                                                     | <i>Total</i><br><i>n (%)</i> <sup>†</sup> | <i>No</i><br><i>n (%)</i> | <i>Yes</i><br><i>n (%)</i> | <i>p-value</i> |
|-----------------------------------------------------|-------------------------------------------|---------------------------|----------------------------|----------------|
| <b>Daily copper intake (mg/1000 kcal)</b>           | 0.85±0.002                                | 0.85±0.002                | 0.85±0.009                 | 0.85           |
| <b>Daily vitamin C intake (mg/1000 kcal)</b>        | 77.1±0.4                                  | 77.0±0.4                  | 78.4±1.9                   | 0.48           |
| <b>Daily vitamin E intake (mg/1000 kcal)</b>        | 3.06±0.02                                 | 3.06±0.02                 | 3.02±0.07                  | 0.54           |
| <b>Daily lycopene intake (µg/1000 kcal)</b>         | 2119±26                                   | 2128±27                   | 1950±115                   | 0.13           |
| <b>Daily xanthophyll intake (µg/1000 kcal)</b>      | 1683±17                                   | 1682±17                   | 1682±73                    | >0.99          |
| <b>Daily α-carotene intake (µg/1000 kcal)</b>       | 342±5                                     | 343±5                     | 329±22                     | 0.55           |
| <b>Daily β-carotene intake (µg/1000 kcal)</b>       | 1699±16                                   | 1701±17                   | 1661±72                    | 0.59           |
| <b>Daily β-cryptoxanthin intake (µg/1000 kcal)</b>  | 52.3±0.5                                  | 52.3±0.5                  | 52.0±2.2                   | 0.91           |
| <b>Daily total carotenoid intake (µg/1000 kcal)</b> | 4404±40                                   | 4409±42                   | 4300±177                   | 0.55           |
| <b>Visit 1 Diet Status</b>                          |                                           |                           |                            | 0.27           |
| Missing Data (n)                                    | 5                                         | 5                         | 0                          |                |
| No                                                  | 8,529 (83)                                | 8,095 (83)                | 434 (81)                   |                |
| Yes                                                 | 1,761 (17)                                | 1,660 (17)                | 101 (19)                   |                |
| <b>GENETICS</b>                                     |                                           |                           |                            |                |
| <b>CFH rs1061170 genotype</b>                       |                                           |                           |                            |                |
| <b>African-American</b>                             |                                           |                           |                            | 0.18           |
| Missing Data (n)                                    | 168                                       | 163                       | 5                          |                |
| TT                                                  | 552 (37)                                  | 529 (37)                  | 23 (37)                    |                |
| CT                                                  | 772 (51)                                  | 744 (52)                  | 28 (44)                    |                |
| CC                                                  | 179 (12)                                  | 167 (11)                  | 12 (19)                    |                |
| <b>Caucasian</b>                                    |                                           |                           |                            | <0.001         |
| TT                                                  | 2906 (42)                                 | 2793 (42)                 | 113 (31)                   |                |
| CT                                                  | 3131 (45)                                 | 2961 (45)                 | 170 (47)                   |                |
| CC                                                  | 904 (13)                                  | 822 (13)                  | 82 (22)                    |                |
| <b>ARMS2, rs10490924 genotype</b>                   |                                           |                           |                            |                |
| <b>African-American</b>                             |                                           |                           |                            | 0.24           |
| Missing Data (n)                                    | 6                                         | 6                         | 0                          |                |
| GG                                                  | 983 (59)                                  | 942 (59)                  | 41 (60)                    |                |
| GT                                                  | 583 (35)                                  | 563 (35)                  | 20 (29)                    |                |
| TT                                                  | 99 (6)                                    | 92 (6)                    | 7 (10)                     |                |
| <b>Caucasian</b>                                    |                                           |                           |                            | <0.001         |
| GG                                                  | 4272 (61)                                 | 4062 (62)                 | 210 (58)                   |                |
| GT                                                  | 2352 (34)                                 | 2235 (34)                 | 117 (32)                   |                |
| TT                                                  | 317 (5)                                   | 279 (4)                   | 38 (10)                    |                |

|                                                            | <i>Total</i><br><i>n (%)</i> <sup>†</sup> | <i>No</i><br><i>n (%)</i> | <i>Yes</i><br><i>n (%)</i> | <i>p-value</i> |
|------------------------------------------------------------|-------------------------------------------|---------------------------|----------------------------|----------------|
| <b>Genetic Risk (CFH rs1061170 C + ARMS2 rs10490924 T)</b> |                                           |                           |                            |                |
| <b>African-American</b>                                    |                                           |                           |                            | 0.52           |
| Missing Data (n)                                           | 174                                       | 169                       | 5                          |                |
| 0 alleles                                                  | 322 (22)                                  | 311 (22)                  | 11 (18)                    |                |
| 1 alleles                                                  | 650 (43)                                  | 624 (43)                  | 26 (41)                    |                |
| ≥2 alleles                                                 | 525 (35)                                  | 499 (35)                  | 26 (41)                    |                |
| <b>Caucasian</b>                                           |                                           |                           |                            | <0.001         |
| 0 alleles                                                  | 1754 (25)                                 | 1689 (26)                 | 65 (18)                    |                |
| 1 alleles                                                  | 2947 (43)                                 | 2806 (43)                 | 141 (39)                   |                |
| ≥2 alleles                                                 | 2240 (32)                                 | 2081 (31)                 | 159 (43)                   |                |

\*Data are presented as number (percentage) unless otherwise noted; n=10,295 for dietary analyses; n=8,612 for genetic analyses

<sup>†</sup>Column percentages may not sum to 100% due to rounding

<sup>‡</sup>Adjusted household income = Household income/(Household size)<sup>0.5</sup>

Supplemental Table 2: Prevalence of early AMD, soft drusen, and RPE depigmentation by quintiles of energy-adjusted xanthophyll intake, visit 3 (n=10,021).

| Association               | Outcome n/<br>Total n <sup>†</sup> | Model I<br>(Unadjusted) |           | Model II<br>(Age-adjusted) |           | Model III<br>(Multivariable-<br>adjusted)* |           | Model IV<br>(Multivariable-<br>adjusted) |           |
|---------------------------|------------------------------------|-------------------------|-----------|----------------------------|-----------|--------------------------------------------|-----------|------------------------------------------|-----------|
|                           |                                    | OR                      | 95% CI    | OR                         | 95% CI    | OR                                         | 95% CI    | OR                                       | 95% CI    |
| <b>Early AMD</b>          |                                    |                         |           |                            |           |                                            |           |                                          |           |
| <i>Overall</i>            |                                    |                         |           |                            |           |                                            |           |                                          |           |
| Q1 (258-440) <sup>†</sup> | 94/2004                            | 1.00                    | referent  | 1.00                       | referent  | 1.00                                       | referent  | 1.00                                     | referent  |
| Q2 (597-756)              | 108/2004                           | 1.16                    | 0.87-1.54 | 1.13                       | 0.85-1.51 | 1.13                                       | 0.85-1.51 | 1.16                                     | 0.87-1.55 |
| Q3 (917-1096)             | 111/2005                           | 1.19                    | 0.90-1.58 | 1.15                       | 0.87-1.53 | 1.14                                       | 0.86-1.52 | 1.18                                     | 0.88-1.57 |
| Q4 (1316-1646)            | 98/2004                            | 1.05                    | 0.78-1.40 | 1.02                       | 0.76-1.36 | 1.02                                       | 0.76-1.37 | 1.07                                     | 0.79-1.44 |
| Q5 (2202-3504)            | 107/2004                           | 1.15                    | 0.86-1.52 | 1.09                       | 0.82-1.44 | 1.13                                       | 0.83-1.52 | 1.17                                     | 0.87-1.56 |
|                           | <i>p for trend</i> <sup>‡</sup>    |                         | 0.66      |                            | 0.94      |                                            | 0.71      |                                          | 0.55      |
| <i>African-American</i>   |                                    |                         |           |                            |           |                                            |           |                                          |           |
| Q1 (286-454) <sup>†</sup> | 6/108                              | 1.00                    | referent  | 1.00                       | referent  | 1.00                                       | referent  | 1.00                                     | referent  |
| Q2 (608-768)              | 9/239                              | 0.67                    | 0.23-1.92 | 0.65                       | 0.23-1.89 | 0.66                                       | 0.23-1.91 | 0.67                                     | 0.23-1.94 |
| Q3 (923-1113)             | 13/299                             | 0.77                    | 0.29-2.09 | 0.74                       | 0.27-2.00 | 0.74                                       | 0.27-2.03 | 0.75                                     | 0.27-2.05 |
| Q4 (1329-1661)            | 15/493                             | 0.53                    | 0.20-1.41 | 0.52                       | 0.20-1.36 | 0.52                                       | 0.19-1.37 | 0.53                                     | 0.20-1.40 |
| Q5 (2266-3793)            | 31/759                             | 0.72                    | 0.30-1.78 | 0.67                       | 0.27-1.66 | 0.68                                       | 0.27-1.69 | 0.69                                     | 0.28-1.74 |
|                           | <i>p for trend</i>                 |                         | 0.95      |                            | 0.81      |                                            | 0.81      |                                          | 0.86      |
| <i>Caucasian</i>          |                                    |                         |           |                            |           |                                            |           |                                          |           |
| Q1 (256-440) <sup>†</sup> | 88/1896                            | 1.00                    | referent  | 1.00                       | referent  | 1.00                                       | referent  | 1.00                                     | referent  |
| Q2 (595-755)              | 99/1765                            | 1.22                    | 0.91-1.64 | 1.18                       | 0.88-1.59 | 1.17                                       | 0.87-1.57 | 1.20                                     | 0.89-1.61 |
| Q3 (916-1095)             | 98/1706                            | 1.25                    | 0.93-1.68 | 1.20                       | 0.89-1.62 | 1.16                                       | 0.86-1.57 | 1.20                                     | 0.89-1.62 |
| Q4 (1310-1640)            | 83/1511                            | 1.19                    | 0.88-1.62 | 1.14                       | 0.83-1.55 | 1.09                                       | 0.79-1.49 | 1.14                                     | 0.83-1.56 |
| Q5 (2167-3344)            | 76/1245                            | 1.34                    | 0.97-1.83 | 1.23                       | 0.89-1.69 | 1.16                                       | 0.84-1.61 | 1.22                                     | 0.88-1.69 |
|                           | <i>p for trend</i>                 |                         | 0.14      |                            | 0.35      |                                            | 0.59      |                                          | 0.42      |
| <b>Soft Drusen</b>        |                                    |                         |           |                            |           |                                            |           |                                          |           |
| <i>Overall</i>            |                                    |                         |           |                            |           |                                            |           |                                          |           |
| Q1                        | 81/2004                            | 1.00                    | referent  | 1.00                       | referent  | 1.00                                       | referent  | 1.00                                     | referent  |
| Q2                        | 86/2004                            | 1.06                    | 0.78-1.45 | 1.04                       | 0.76-1.42 | 1.03                                       | 0.76-1.41 | 1.06                                     | 0.77-1.45 |
| Q3                        | 94/2005                            | 1.17                    | 0.86-1.58 | 1.13                       | 0.84-1.54 | 1.10                                       | 0.81-1.50 | 1.13                                     | 0.83-1.54 |
| Q4                        | 86/2004                            | 1.06                    | 0.78-1.45 | 1.04                       | 0.76-1.41 | 1.01                                       | 0.74-1.39 | 1.05                                     | 0.76-1.45 |
| Q5                        | 91/2004                            | 1.13                    | 0.83-1.53 | 1.07                       | 0.79-1.46 | 1.06                                       | 0.77-1.46 | 1.10                                     | 0.79-1.52 |
|                           | <i>p for trend</i>                 |                         | 0.55      |                            | 0.79      |                                            | 0.83      |                                          | 0.70      |
| <i>African-American</i>   |                                    |                         |           |                            |           |                                            |           |                                          |           |
| Q1                        | 6/108                              | 1.00                    | referent  | 1.00                       | referent  | 1.00                                       | referent  | 1.00                                     | referent  |
| Q2                        | 8/239                              | 0.59                    | 0.20-1.74 | 0.58                       | 0.20-1.71 | 0.59                                       | 0.20-1.75 | 0.59                                     | 0.20-1.75 |
| Q3                        | 10/299                             | 0.59                    | 0.21-1.66 | 0.56                       | 0.20-1.59 | 0.57                                       | 0.20-1.64 | 0.56                                     | 0.20-1.61 |
| Q4                        | 14/493                             | 0.50                    | 0.19-1.32 | 0.48                       | 0.18-1.28 | 0.49                                       | 0.18-1.31 | 0.48                                     | 0.18-1.30 |
| Q5                        | 30/759                             | 0.70                    | 0.28-1.72 | 0.65                       | 0.26-1.61 | 0.66                                       | 0.27-1.66 | 0.66                                     | 0.26-1.65 |
|                           | <i>p for trend</i>                 |                         | 0.77      |                            | 0.90      |                                            | 0.87      |                                          | 0.88      |
| <i>Caucasian</i>          |                                    |                         |           |                            |           |                                            |           |                                          |           |
| Q1                        | 75/1896                            | 1.00                    | referent  | 1.00                       | referent  | 1.00                                       | referent  | 1.00                                     | referent  |
| Q2                        | 78/1765                            | 1.12                    | 0.81-1.55 | 1.09                       | 0.79-1.51 | 1.07                                       | 0.77-1.48 | 1.10                                     | 0.79-1.53 |
| Q3                        | 84/1706                            | 1.26                    | 0.91-1.73 | 1.21                       | 0.88-1.67 | 1.15                                       | 0.83-1.59 | 1.19                                     | 0.86-1.65 |
| Q4                        | 72/1511                            | 1.22                    | 0.87-1.69 | 1.16                       | 0.83-1.61 | 1.09                                       | 0.78-1.52 | 1.14                                     | 0.81-1.60 |
| Q5                        | 61/1245                            | 1.25                    | 0.89-1.77 | 1.15                       | 0.81-1.63 | 1.06                                       | 0.75-1.52 | 1.11                                     | 0.78-1.59 |
|                           | <i>p for trend</i>                 |                         | 0.23      |                            | 0.48      |                                            | 0.85      |                                          | 0.68      |
| <b>RPE Depigmentation</b> |                                    |                         |           |                            |           |                                            |           |                                          |           |
| <i>Overall</i>            |                                    |                         |           |                            |           |                                            |           |                                          |           |
| Q1                        | 23/2004                            | 1.00                    | referent  | 1.00                       | referent  | 1.00                                       | referent  | 1.00                                     | referent  |
| Q2                        | 25/2004                            | 1.09                    | 0.62-1.92 | 1.06                       | 0.60-1.88 | 1.12                                       | 0.63-1.99 | 1.17                                     | 0.66-2.07 |
| Q3                        | 22/2005                            | 0.96                    | 0.53-1.72 | 0.93                       | 0.51-1.67 | 1.04                                       | 0.57-1.88 | 1.09                                     | 0.60-1.98 |
| Q4                        | 18/2004                            | 0.78                    | 0.42-1.45 | 0.76                       | 0.41-1.41 | 0.92                                       | 0.49-1.73 | 0.99                                     | 0.52-1.86 |

|                         |                    |      |           |      |           |      |           |      |           |
|-------------------------|--------------------|------|-----------|------|-----------|------|-----------|------|-----------|
| Q5                      | 24/2004            | 1.04 | 0.59-1.86 | 0.99 | 0.55-1.76 | 1.38 | 0.76-2.52 | 1.49 | 0.81-2.73 |
|                         | <b>p for trend</b> |      | 0.94      |      | 0.80      |      | 0.34      |      | 0.24      |
| <i>African-American</i> |                    |      |           |      |           |      |           |      |           |
| Q1                      | 0/108              | 1.00 | referent  | 1.00 | referent  | 1.00 | referent  | 1.00 | referent  |
| Q2                      | 1/239              | -    | -         | -    | -         | -    | -         | -    | -         |
| Q3                      | 3/299              | -    | -         | -    | -         | -    | -         | -    | -         |
| Q4                      | 2/493              | -    | -         | -    | -         | -    | -         | -    | -         |
| Q5                      | 1/759              | -    | -         | -    | -         | -    | -         | -    | -         |
|                         | <b>p for trend</b> |      | -         |      | -         |      | -         |      | -         |
| <i>Caucasian</i>        |                    |      |           |      |           |      |           |      |           |
| Q1                      | 23/1896            | 1.00 | referent  | 1.00 | referent  | 1.00 | referent  | 1.00 | referent  |
| Q2                      | 24/1765            | 1.12 | 0.63-2.00 | 1.09 | 0.61-1.94 | 1.10 | 0.62-1.96 | 1.13 | 0.63-2.01 |
| Q3                      | 19/1706            | 0.92 | 0.50-1.69 | 0.88 | 0.48-1.63 | 0.93 | 0.50-1.72 | 0.96 | 0.52-1.79 |
| Q4                      | 16/1511            | 0.87 | 0.46-1.66 | 0.83 | 0.44-1.58 | 0.88 | 0.46-1.69 | 0.92 | 0.48-1.78 |
| Q5                      | 23/1245            | 1.53 | 0.86-2.74 | 1.41 | 0.79-2.53 | 1.54 | 0.84-2.80 | 1.63 | 0.89-2.98 |
|                         | <b>p for trend</b> |      | 0.18      |      | 0.28      |      | 0.17      |      | 0.12      |

\*Model III: adjusted for age, race field center, and visit 3 daily caloric intake

Model IV: adjusted for age, sex, race, pack-years of smoking, field center, and visit 1 daily caloric intake

†Quintiles and interquartile range ( $\mu\text{g}/1000$  kcal) of energy-adjusted daily xanthophyll intake at visit 3

‡Reflects distribution of unadjusted model; data was missing for pack-years of smoking in multivariable-adjusted model

\*p-value for linear trend was calculated using quintile medians



Supplemental Table 3: Prevalence of early AMD, soft drusen, and RPE depigmentation by quintiles of energy-adjusted xanthophyll intake, average of visit 1 and visit 3 (n=10,021).

| Association               | Outcome n/<br>Total n <sup>†</sup> | Model I<br>(Unadjusted) |           | Model II<br>(Age-adjusted) |           | Model III<br>(Multivariable-<br>adjusted)* |           | Model IV<br>(Multivariable-<br>adjusted)* |           |
|---------------------------|------------------------------------|-------------------------|-----------|----------------------------|-----------|--------------------------------------------|-----------|-------------------------------------------|-----------|
|                           |                                    | OR                      | 95% CI    | OR                         | 95% CI    | OR                                         | 95% CI    | OR                                        | 95% CI    |
| <b>Early AMD</b>          |                                    |                         |           |                            |           |                                            |           |                                           |           |
| <i>Overall</i>            |                                    |                         |           |                            |           |                                            |           |                                           |           |
| Q1 (314-538) <sup>†</sup> | 90/2004                            | 1.00                    | referent  | 1.00                       | referent  | 1.00                                       | referent  | 1.00                                      | referent  |
| Q2 (717-891)              | 113/2004                           | 1.27                    | 0.96-1.69 | 1.25                       | 0.94-1.67 | 1.24                                       | 0.93-1.65 | 1.26                                      | 0.95-1.68 |
| Q3 (1075-1267)            | 112/2005                           | 1.26                    | 0.95-1.67 | 1.22                       | 0.92-1.62 | 1.21                                       | 0.90-1.61 | 1.24                                      | 0.93-1.66 |
| Q4 (1531-1913)            | 106/2004                           | 1.19                    | 0.89-1.58 | 1.16                       | 0.87-1.54 | 1.17                                       | 0.86-1.58 | 1.21                                      | 0.89-1.64 |
| Q5 (2510-3757)            | 97/2004                            | 1.08                    | 0.81-1.45 | 1.01                       | 0.75-1.36 | 1.04                                       | 0.76-1.42 | 1.08                                      | 0.79-1.48 |
|                           | <i>p for trend</i> <sup>‡</sup>    |                         | 0.84      |                            | 0.50      |                                            | 0.66      |                                           | 0.84      |
| <i>African-American</i>   |                                    |                         |           |                            |           |                                            |           |                                           |           |
| Q1 (356-591) <sup>†</sup> | 2/49                               | 1.00                    | referent  | 1.00                       | referent  | 1.00                                       | referent  | 1.00                                      | referent  |
| Q2 (751-916)              | 7/166                              | 1.04                    | 0.21-5.15 | 1.05                       | 0.21-5.23 | 1.04                                       | 0.21-5.22 | 1.02                                      | 0.20-5.13 |
| Q3 (1108-1297)            | 13/311                             | 1.03                    | 0.22-4.69 | 1.03                       | 0.22-4.70 | 1.03                                       | 0.22-4.74 | 1.02                                      | 0.22-4.71 |
| Q4 (1555-1956)            | 26/586                             | 1.09                    | 0.25-4.74 | 1.06                       | 0.24-4.63 | 1.06                                       | 0.24-4.65 | 1.05                                      | 0.24-4.63 |
| Q5 (2544-3870)            | 26/786                             | 0.80                    | 0.19-3.49 | 0.76                       | 0.17-3.29 | 0.77                                       | 0.18-3.40 | 0.77                                      | 0.17-3.38 |
|                           | <i>p for trend</i>                 |                         | 0.34      |                            | 0.24      |                                            | 0.28      |                                           | 0.28      |
| <i>Caucasian</i>          |                                    |                         |           |                            |           |                                            |           |                                           |           |
| Q1 (314-535) <sup>†</sup> | 88/1955                            | 1.00                    | referent  | 1.00                       | referent  | 1.00                                       | referent  | 1.00                                      | referent  |
| Q2 (713-889)              | 106/1838                           | 1.30                    | 0.97-1.74 | 1.27                       | 0.95-1.70 | 1.24                                       | 0.92-1.66 | 1.26                                      | 0.94-1.69 |
| Q3 (1072-1260)            | 99/1694                            | 1.32                    | 0.98-1.77 | 1.25                       | 0.93-1.68 | 1.20                                       | 0.89-1.62 | 1.24                                      | 0.91-1.67 |
| Q4 (1525-1894)            | 80/1418                            | 1.27                    | 0.93-1.73 | 1.20                       | 0.88-1.64 | 1.13                                       | 0.82-1.55 | 1.17                                      | 0.85-1.62 |
| Q5 (2480-3676)            | 71/1218                            | 1.31                    | 0.95-1.81 | 1.18                       | 0.85-1.63 | 1.10                                       | 0.79-1.53 | 1.15                                      | 0.82-1.61 |
|                           | <i>p for trend</i>                 |                         | 0.21      |                            | 0.59      |                                            | 0.98      |                                           | 0.78      |
| <b>Soft Drusen</b>        |                                    |                         |           |                            |           |                                            |           |                                           |           |
| <i>Overall</i>            |                                    |                         |           |                            |           |                                            |           |                                           |           |
| Q1                        | 74/2004                            | 1.00                    | referent  | 1.00                       | referent  | 1.00                                       | referent  | 1.00                                      | referent  |
| Q2                        | 95/2004                            | 1.30                    | 0.95-1.77 | 1.28                       | 0.94-1.75 | 1.25                                       | 0.92-1.71 | 1.27                                      | 0.93-1.74 |
| Q3                        | 92/2005                            | 1.25                    | 0.92-1.71 | 1.22                       | 0.89-1.67 | 1.18                                       | 0.86-1.62 | 1.21                                      | 0.88-1.66 |
| Q4                        | 92/2004                            | 1.26                    | 0.92-1.72 | 1.22                       | 0.89-1.67 | 1.19                                       | 0.86-1.65 | 1.22                                      | 0.88-1.70 |
| Q5                        | 85/2004                            | 1.16                    | 0.84-1.59 | 1.08                       | 0.79-1.49 | 1.06                                       | 0.75-1.49 | 1.09                                      | 0.78-1.54 |
|                           | <i>p for trend</i>                 |                         | 0.78      |                            | 0.88      |                                            | 0.79      |                                           | 0.91      |
| <i>African-American</i>   |                                    |                         |           |                            |           |                                            |           |                                           |           |
| Q1                        | 2/49                               | 1.00                    | referent  | 1.00                       | referent  | 1.00                                       | referent  | 1.00                                      | referent  |
| Q2                        | 6/166                              | 0.88                    | 0.17-4.51 | 0.89                       | 0.17-4.58 | 0.88                                       | 0.17-4.56 | 0.86                                      | 0.17-4.46 |
| Q3                        | 11/311                             | 0.86                    | 0.19-4.01 | 0.86                       | 0.19-4.02 | 0.86                                       | 0.18-4.04 | 0.84                                      | 0.18-3.96 |
| Q4                        | 25/586                             | 1.05                    | 0.24-4.56 | 1.02                       | 0.23-4.45 | 1.01                                       | 0.23-4.45 | 0.98                                      | 0.22-4.33 |
| Q5                        | 24/786                             | 0.74                    | 0.17-3.23 | 0.70                       | 0.16-3.04 | 0.71                                       | 0.16-3.13 | 0.69                                      | 0.16-3.05 |
|                           | <i>p for trend</i>                 |                         | 0.43      |                            | 0.31      |                                            | 0.36      |                                           | 0.34      |
| <i>Caucasian</i>          |                                    |                         |           |                            |           |                                            |           |                                           |           |
| Q1                        | 72/1955                            | 1.00                    | referent  | 1.00                       | referent  | 1.00                                       | referent  | 1.00                                      | Referent  |
| Q2                        | 89/1838                            | 1.33                    | 0.97-1.83 | 1.30                       | 0.94-1.79 | 1.26                                       | 0.92-1.74 | 1.28                                      | 0.93-1.77 |
| Q3                        | 81/1694                            | 1.31                    | 0.95-1.82 | 1.25                       | 0.90-1.73 | 1.18                                       | 0.85-1.64 | 1.22                                      | 0.88-1.70 |
| Q4                        | 67/1418                            | 1.30                    | 0.92-1.82 | 1.23                       | 0.87-1.73 | 1.13                                       | 0.80-1.61 | 1.18                                      | 0.83-1.67 |
| Q5                        | 61/1218                            | 1.38                    | 0.97-1.95 | 1.24                       | 0.87-1.76 | 1.13                                       | 0.79-1.62 | 1.18                                      | 0.82-1.70 |
|                           | <i>p for trend</i>                 |                         | 0.16      |                            | 0.44      |                                            | 0.89      |                                           | 0.72      |
| <b>RPE Depigmentation</b> |                                    |                         |           |                            |           |                                            |           |                                           |           |
| <i>Overall</i>            |                                    |                         |           |                            |           |                                            |           |                                           |           |
| Q1                        | 23/2004                            | 1.00                    | referent  | 1.00                       | referent  | 1.00                                       | referent  | 1.00                                      | referent  |
| Q2                        | 24/2004                            | 1.04                    | 0.59-1.86 | 1.03                       | 0.58-1.83 | 1.09                                       | 0.61-1.94 | 1.13                                      | 0.63-2.02 |
| Q3                        | 26/2005                            | 1.13                    | 0.64-1.99 | 1.10                       | 0.62-1.93 | 1.25                                       | 0.71-2.23 | 1.31                                      | 0.74-2.34 |
| Q4                        | 22/2004                            | 0.96                    | 0.53-1.72 | 0.93                       | 0.52-1.67 | 1.21                                       | 0.66-2.23 | 1.29                                      | 0.70-2.38 |

|                         |                    |      |           |      |           |      |           |      |           |
|-------------------------|--------------------|------|-----------|------|-----------|------|-----------|------|-----------|
| Q5                      | 17/2004            | 0.74 | 0.39-1.38 | 0.69 | 0.37-1.29 | 0.99 | 0.51-1.92 | 1.07 | 0.55-2.09 |
|                         | <b>p for trend</b> |      | 0.24      |      | 0.16      |      | 0.92      |      | 0.90      |
| <b>African-American</b> |                    |      |           |      |           |      |           |      |           |
| Q1                      | 0/49               | 1.00 | referent  | 1.00 | referent  | 1.00 | referent  | 1.00 | referent  |
| Q2                      | 1/166              | -    | -         | -    | -         | -    | -         | -    | -         |
| Q3                      | 2/311              | -    | -         | -    | -         | -    | -         | -    | -         |
| Q4                      | 2/586              | -    | -         | -    | -         | -    | -         | -    | -         |
| Q5                      | 2/786              | -    | -         | -    | -         | -    | -         | -    | -         |
|                         | <b>p for trend</b> |      | -         |      | -         |      | -         |      | -         |
| <b>Caucasian</b>        |                    |      |           |      |           |      |           |      |           |
| Q1                      | 23/1955            | 1.00 | referent  | 1.00 | referent  | 1.00 | referent  | 1.00 | referent  |
| Q2                      | 23/1838            | 1.06 | 0.60-1.90 | 1.04 | 0.58-1.86 | 1.06 | 0.59-1.90 | 1.09 | 0.61-1.96 |
| Q3                      | 24/1694            | 1.21 | 0.68-2.15 | 1.15 | 0.64-2.04 | 1.20 | 0.67-2.15 | 1.24 | 0.69-2.23 |
| Q4                      | 20/1418            | 1.20 | 0.66-2.20 | 1.14 | 0.62-2.08 | 1.21 | 0.65-2.26 | 1.28 | 0.69-2.39 |
| Q5                      | 15/1218            | 1.05 | 0.54-2.02 | 0.94 | 0.49-1.82 | 1.02 | 0.52-2.01 | 1.09 | 0.55-2.16 |
|                         | <b>p for trend</b> |      | 0.86      |      | 0.87      |      | 0.93      |      | 0.78      |

\*Model III: adjusted for age, race, field center, and average of visit 1 and visit 3 daily caloric intake

Model IV: adjusted for age, sex, race, pack-years of smoking, field center, and average of visit 1 and visit 3 daily caloric intake

†Quintiles and interquartile range ( $\mu\text{g}/1000 \text{ kcal}$ ) of energy-adjusted daily xanthophyll intake (average of visit 1 and visit 3)

‡Reflects distribution of unadjusted model; data was missing for pack-years of smoking in multivariable-adjusted model

§p-value for linear trend was calculated using quintile medians

Supplemental Table 4: Prevalence of early AMD, soft drusen, and RPE depigmentation by quintiles of visit 1 energy-adjusted xanthophyll intake, among participants exhibiting  $\leq 1$  quintile change in xanthophyll intake at visit 3 (n=7,344).

| Association               | Outcome n/<br>Total n <sup>†</sup> | Model I<br>(Unadjusted) |                | Model II<br>(Age-adjusted) |                | Model III<br>(Multivariable-<br>adjusted)* |            | Model IV<br>(Multivariable-<br>adjusted)* |            |
|---------------------------|------------------------------------|-------------------------|----------------|----------------------------|----------------|--------------------------------------------|------------|-------------------------------------------|------------|
|                           |                                    | OR                      | 95% CI         | OR                         | 95% CI         | OR                                         | 95% CI     | OR                                        | 95% CI     |
| <b>Early AMD</b>          |                                    |                         |                |                            |                |                                            |            |                                           |            |
| <i>Overall</i>            |                                    |                         |                |                            |                |                                            |            |                                           |            |
| Q1 (236-437) <sup>†</sup> | 69/1532                            | 1.00                    | referent       | 1.00                       | referent       | 1.00                                       | referent   | 1.00                                      | referent   |
| Q2 (653-859)              | 78/1471                            | 1.19                    | 0.85-1.66      | 1.17                       | 0.84-1.63      | 1.14                                       | 0.81-1.59  | 1.15                                      | 0.82-1.61  |
| Q3 (1083-1306)            | 77/1415                            | 1.22                    | 0.87-1.70      | 1.20                       | 0.86-1.67      | 1.19                                       | 0.85-1.68  | 1.22                                      | 0.87-1.72  |
| Q4 (1594-2041)            | 81/1557                            | 1.16                    | 0.84-1.62      | 1.13                       | 0.81-1.57      | 1.18                                       | 0.83-1.67  | 1.21                                      | 0.85-1.73  |
| Q5 (2944-5092)            | 65/1369                            | 1.06                    | 0.75-1.50      | 0.98                       | 0.69-1.39      | 1.03                                       | 0.71-1.50  | 1.06                                      | 0.73-1.55  |
|                           | <i>p for trend</i> <sup>‡</sup>    |                         | 0.88           |                            | 0.55           |                                            | 0.80       |                                           | 0.89       |
| <i>African-American</i>   |                                    |                         |                |                            |                |                                            |            |                                           |            |
| Q1 (163-473) <sup>†</sup> | 1/27                               | 1.00                    | referent       | 1.00                       | referent       | 1.00                                       | referent   | 1.00                                      | referent   |
| Q2 (668-882)              | 6/90                               | 1.86                    | 0.21-<br>16.14 | 1.86                       | 0.21-<br>16.14 | 1.79                                       | 0.21-15.61 | 1.77                                      | 0.20-15.56 |
| Q3 (1117-1307)            | 7/208                              | 0.91                    | 0.11-7.66      | 0.91                       | 0.11-7.65      | 0.91                                       | 0.11-7.76  | 0.93                                      | 0.11-7.94  |
| Q4 (1619-2063)            | 14/475                             | 0.79                    | 0.10-6.24      | 0.79                       | 0.10-6.25      | 0.85                                       | 0.11-6.84  | 0.89                                      | 0.11-7.15  |
| Q5 (2954-5093)            | 23/556                             | 1.12                    | 0.15-8.63      | 1.13                       | 0.15-8.67      | 1.19                                       | 0.15-9.30  | 1.23                                      | 0.16-9.67  |
|                           | <i>p for trend</i>                 |                         | 0.83           |                            | 0.82           |                                            | 0.72       |                                           | 0.68       |
| <i>Caucasian</i>          |                                    |                         |                |                            |                |                                            |            |                                           |            |
| Q1 (237-437) <sup>†</sup> | 68/1505                            | 1.00                    | referent       | 1.00                       | referent       | 1.00                                       | referent   | 1.00                                      | referent   |
| Q2 (652-857)              | 72/1381                            | 1.16                    | 0.83-1.63      | 1.13                       | 0.80-1.59      | 1.09                                       | 0.78-1.54  | 1.11                                      | 0.78-1.56  |
| Q3 (1078-1306)            | 70/1207                            | 1.30                    | 0.92-1.83      | 1.25                       | 0.89-1.76      | 1.20                                       | 0.85-1.71  | 1.23                                      | 0.86-1.74  |
| Q4 (1581-2034)            | 67/1082                            | 1.40                    | 0.99-1.97      | 1.30                       | 0.92-1.85      | 1.24                                       | 0.87-1.78  | 1.27                                      | 0.88-1.84  |
| Q5 (2939-5092)            | 42/813                             | 1.15                    | 0.78-1.71      | 1.02                       | 0.68-1.52      | 0.94                                       | 0.62-1.42  | 0.97                                      | 0.64-1.47  |
|                           | <i>p for trend</i>                 |                         | 0.50           |                            | 0.99           |                                            | 0.65       |                                           | 0.73       |
| <b>Soft Drusen</b>        |                                    |                         |                |                            |                |                                            |            |                                           |            |
| <i>Overall</i>            |                                    |                         |                |                            |                |                                            |            |                                           |            |
| Q1                        | 55/1532                            | 1.00                    | referent       | 1.00                       | referent       | 1.00                                       | referent   | 1.00                                      | referent   |
| Q2                        | 67/1471                            | 1.28                    | 0.89-1.84      | 1.26                       | 0.88-1.82      | 1.23                                       | 0.85-1.77  | 1.23                                      | 0.85-1.78  |
| Q3                        | 67/1415                            | 1.34                    | 0.93-1.92      | 1.31                       | 0.91-1.89      | 1.29                                       | 0.89-1.87  | 1.31                                      | 0.90-1.91  |
| Q4                        | 68/1557                            | 1.23                    | 0.85-1.76      | 1.19                       | 0.83-1.71      | 1.21                                       | 0.82-1.78  | 1.23                                      | 0.84-1.82  |
| Q5                        | 59/1369                            | 1.21                    | 0.83-1.76      | 1.13                       | 0.78-1.65      | 1.15                                       | 0.77-1.73  | 1.17                                      | 0.78-1.77  |
|                           | <i>p for trend</i>                 |                         | 0.68           |                            | 0.98           |                                            | 0.89       |                                           | 0.84       |
| <i>African-American</i>   |                                    |                         |                |                            |                |                                            |            |                                           |            |
| Q1                        | 1/27                               | 1.00                    | referent       | 1.00                       | referent       | 1.00                                       | referent   | 1.00                                      | referent   |
| Q2                        | 5/90                               | 1.83                    | 0.17-<br>13.69 | 1.53                       | 0.17-<br>13.68 | 1.47                                       | 0.16-13.18 | 1.43                                      | 0.16-12.88 |
| Q3                        | 7/208                              | 0.91                    | 0.11-7.66      | 0.91                       | 0.11-7.65      | 0.88                                       | 0.10-7.48  | 0.86                                      | 0.10-7.35  |
| Q4                        | 11/475                             | 0.62                    | 0.08-4.96      | 0.62                       | 0.08-4.97      | 0.62                                       | 0.08-5.04  | 0.61                                      | 0.08-5.03  |
| Q5                        | 22/556                             | 1.07                    | 0.14-8.26      | 1.08                       | 0.14-8.33      | 1.07                                       | 0.14-8.35  | 1.06                                      | 0.14-8.32  |
|                           | <i>p for trend</i>                 |                         | 0.62           |                            | 0.60           |                                            | 0.57       |                                           | 0.55       |
| <i>Caucasian</i>          |                                    |                         |                |                            |                |                                            |            |                                           |            |
| Q1                        | 54/1505                            | 1.00                    | referent       | 1.00                       | referent       | 1.00                                       | referent   | 1.00                                      | Referent   |
| Q2                        | 62/1381                            | 1.26                    | 0.87-1.83      | 1.23                       | 0.85-1.79      | 1.19                                       | 0.82-1.73  | 1.20                                      | 0.83-1.74  |
| Q3                        | 60/1207                            | 1.41                    | 0.97-2.05      | 1.35                       | 0.93-1.97      | 1.29                                       | 0.88-1.90  | 1.32                                      | 0.90-1.94  |
| Q4                        | 57/1082                            | 1.49                    | 1.02-2.19      | 1.40                       | 0.95-2.05      | 1.32                                       | 0.89-1.96  | 1.35                                      | 0.90-2.01  |
| Q5                        | 37/813                             | 1.28                    | 0.84-1.96      | 1.14                       | 0.74-1.75      | 1.04                                       | 0.67-1.63  | 1.06                                      | 0.68-1.67  |
|                           | <i>p for trend</i>                 |                         | 0.32           |                            | 0.71           |                                            | 0.90       |                                           | 0.95       |
| <b>RPE Depigmentation</b> |                                    |                         |                |                            |                |                                            |            |                                           |            |
| <i>Overall</i>            |                                    |                         |                |                            |                |                                            |            |                                           |            |
| Q1                        | 17/1532                            | 1.00                    | referent       | 1.00                       | referent       | 1.00                                       | referent   | 1.00                                      | referent   |

|                         |                    |      |           |      |           |      |           |      |           |
|-------------------------|--------------------|------|-----------|------|-----------|------|-----------|------|-----------|
| Q2                      | 19/1471            | 1.17 | 0.60-2.25 | 1.14 | 0.59-2.21 | 1.20 | 0.62-2.32 | 1.25 | 0.64-2.42 |
| Q3                      | 14/1415            | 0.89 | 0.44-1.81 | 0.87 | 0.43-1.78 | 1.01 | 0.49-2.09 | 1.08 | 0.52-2.23 |
| Q4                      | 15/1557            | 0.87 | 0.43-1.74 | 0.84 | 0.42-1.69 | 1.14 | 0.54-2.38 | 1.23 | 0.59-2.60 |
| Q5                      | 10/1369            | 0.66 | 0.30-1.44 | 0.61 | 0.28-1.33 | 0.89 | 0.38-2.05 | 0.97 | 0.41-2.26 |
|                         | <b>p for trend</b> |      | 0.18      |      | 0.12      |      | 0.66      |      | 0.80      |
| <i>African-American</i> |                    |      |           |      |           |      |           |      |           |
| Q1                      | 0/27               | 1.00 | referent  | 1.00 | referent  | 1.00 | referent  | 1.00 | referent  |
| Q2                      | 1/90               | -    | -         | -    | -         | -    | -         | -    | -         |
| Q3                      | 1/208              | -    | -         | -    | -         | -    | -         | -    | -         |
| Q4                      | 3/475              | -    | -         | -    | -         | -    | -         | -    | -         |
| Q5                      | 1/556              | -    | -         | -    | -         | -    | -         | -    | -         |
|                         | <b>p for trend</b> |      | -         |      | -         |      | -         |      | -         |
| <i>Caucasian</i>        |                    |      |           |      |           |      |           |      |           |
| Q1                      | 17/1505            | 1.00 | referent  | 1.00 | referent  | 1.00 | referent  | 1.00 | referent  |
| Q2                      | 18/1381            | 1.16 | 0.59-2.25 | 1.13 | 0.58-2.19 | 1.16 | 0.59-2.27 | 1.20 | 0.61-2.34 |
| Q3                      | 13/1207            | 0.95 | 0.46-1.97 | 0.92 | 0.44-1.89 | 0.97 | 0.47-2.03 | 1.02 | 0.48-2.13 |
| Q4                      | 12/1082            | 0.98 | 0.47-2.06 | 0.92 | 0.44-1.93 | 1.01 | 0.47-2.18 | 1.07 | 0.49-2.33 |
| Q5                      | 9/813              | 0.98 | 0.44-2.21 | 0.87 | 0.39-1.97 | 0.98 | 0.42-2.29 | 1.05 | 0.45-2.48 |
|                         | <b>p for trend</b> |      | 0.84      |      | 0.62      |      | 0.85      |      | 0.98      |

\*Model III: adjusted for age, race, field center, and visit 1 daily caloric intake

Model IV: adjusted for age, sex, race, pack-years of smoking, field center, and visit 1 daily caloric intake

†Quintiles and interquartile range ( $\mu\text{g}/1000$  kcal) of energy-adjusted daily xanthophyll intake at visit 1

‡Reflects distribution of unadjusted model; data was missing for pack-years of smoking in multivariable-adjusted model

\*p-value for linear trend was calculated using quintile medians

Supplemental Table 5: Associations of *CFH* rs1061170 and *ARMS2* 10490924 genotype with prevalent early AMD.

|                                                                                     | Outcome n/Total n | Multivariable-adjusted OR (95% CI) <sup>*</sup> |
|-------------------------------------------------------------------------------------|-------------------|-------------------------------------------------|
| <b>Early AMD</b>                                                                    |                   |                                                 |
| <b><i>CFH</i> rs1061170</b>                                                         |                   |                                                 |
| <b>African-Americans</b>                                                            |                   |                                                 |
| CC (2 risk alleles)                                                                 | 12/179            | referent                                        |
| CT (1 risk allele)                                                                  | 28/772            | 0.53 (0.26-1.06)                                |
| TT (0 risk alleles)                                                                 | 23/552            | 0.64 (0.31-1.32)                                |
| <b>Caucasians</b>                                                                   |                   |                                                 |
| CC (2 risk alleles)                                                                 | 82/904            | referent                                        |
| CT (1 risk allele)                                                                  | 170/3131          | 0.59 (0.45-0.78)                                |
| TT (0 risk alleles)                                                                 | 113/2906          | 0.41 (0.31-0.55)                                |
| <b><i>ARMS2</i> rs10490924</b>                                                      |                   |                                                 |
| <b>African-Americans</b>                                                            |                   |                                                 |
| TT (2 risk alleles)                                                                 | 7/99              | referent                                        |
| GT (1 risk allele)                                                                  | 20/583            | 0.47 (0.19-1.15)                                |
| GG (0 risk alleles)                                                                 | 41/983            | 0.58 (0.25-1.33)                                |
| <b>Caucasians</b>                                                                   |                   |                                                 |
| TT (2 risk alleles)                                                                 | 38/317            | referent                                        |
| GT (1 risk allele)                                                                  | 117/2352          | 0.38 (0.26-0.56)                                |
| GG (0 risk alleles)                                                                 | 210/4272          | 0.37 (0.25-0.53)                                |
| <b>Combined genetic risk (<i>CFH</i> rs1061170 C and <i>ARMS2</i> rs10490924 T)</b> |                   |                                                 |
| <b>African-Americans</b>                                                            |                   |                                                 |
| ≥2 risk alleles                                                                     | 26/525            | referent                                        |
| 1 risk allele                                                                       | 26/650            | 0.81 (0.46-1.41)                                |
| 0 risk alleles                                                                      | 11/322            | 0.71 (0.34-1.45)                                |
| <b>Caucasians</b>                                                                   |                   |                                                 |
| ≥2 risk alleles                                                                     | 159/2240          | referent                                        |
| 1 risk allele                                                                       | 141/2947          | 0.66 (0.52-0.83)                                |
| 0 risk alleles                                                                      | 65/1754           | 0.49 (0.37-0.67)                                |

<sup>\*</sup>Adjusted for age, sex, race, pack-years of smoking, field center, and visit 1 daily caloric intake,

<sup>†</sup>Association between genotype (treated as a categorical variable) and early AMD.
